# Supplementary material for: Identification and characterization of stressed degradation products of rabeprazole using LC-ESI/MS/MS and 1H-NMR experiments: in vitro toxicity evaluation of major degradation products
Source: Royal Society of Chemistry journal article supplement (doi:10.1039/c5ra27965h), 2016-01-01
Supplement: c5ra27965h1.pdf [file c5ra27965h1.pdf]

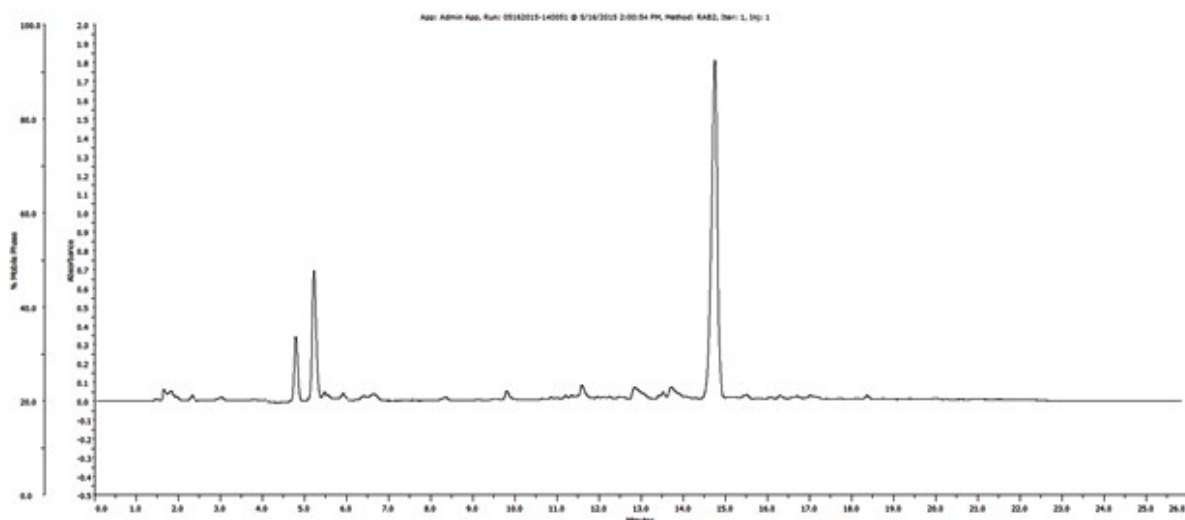

**Figure S1.** Semi preparative HPLC Chromatogram of acid degradation solution

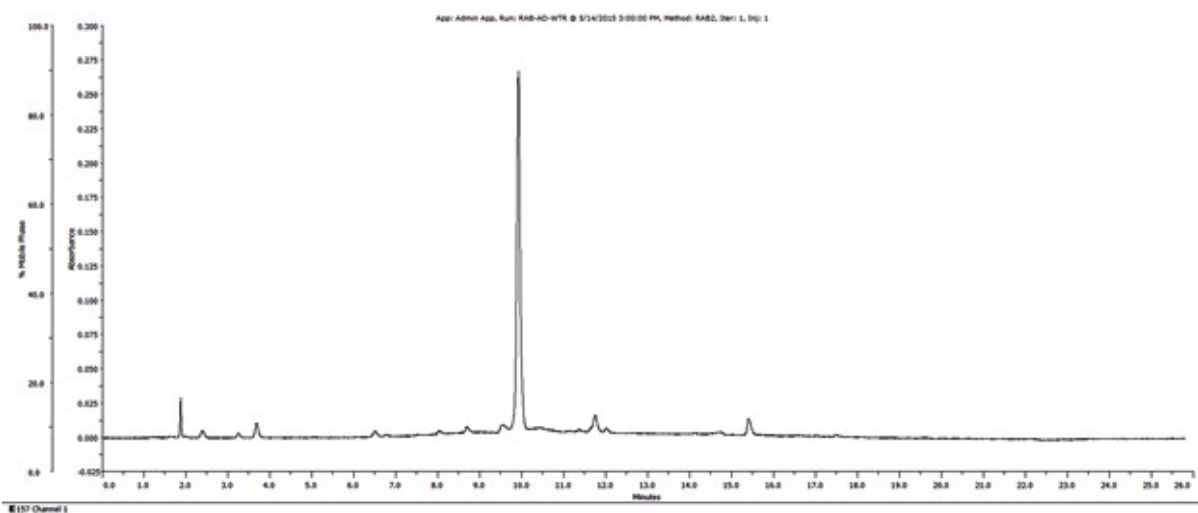

**Figure S2.** Semi preparative HPLC Chromatogram of oxidative degradation solution

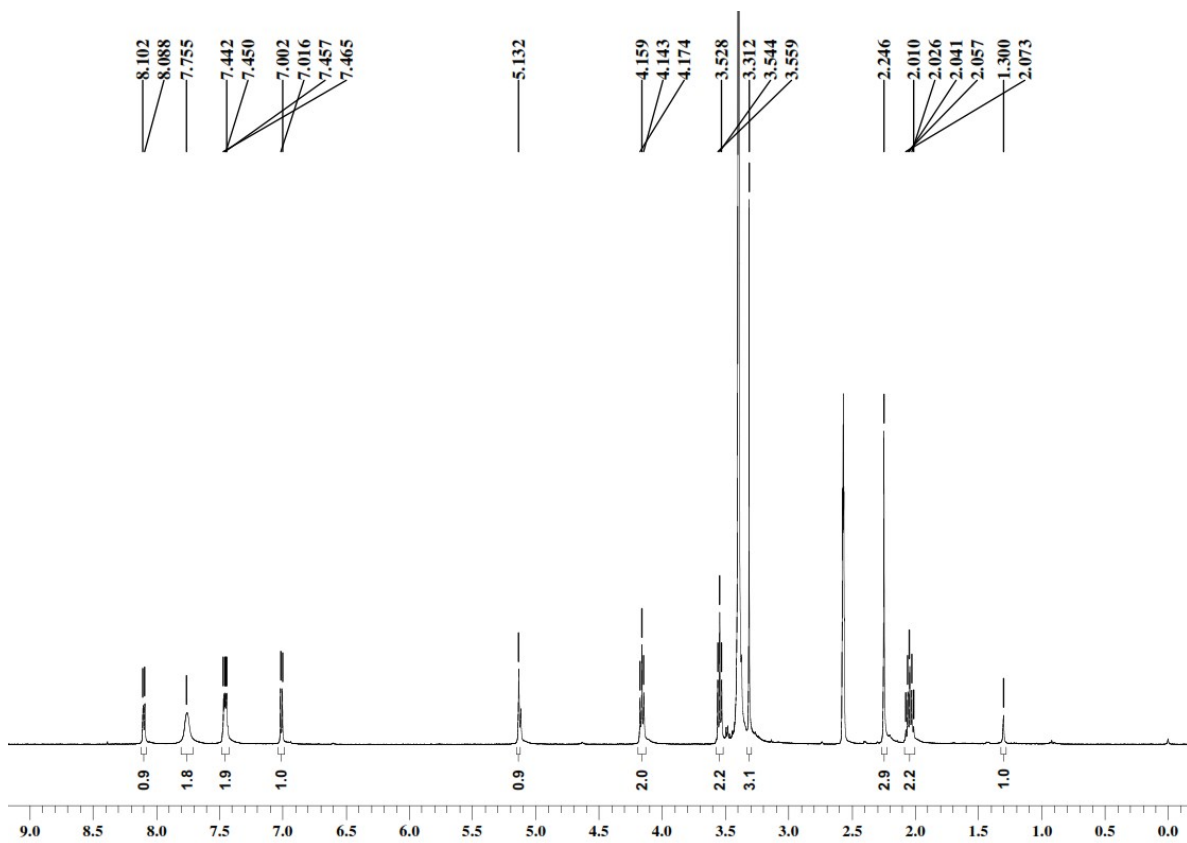

Figure S3.  $^1\text{H}$  NMR of acid degradation compound R3

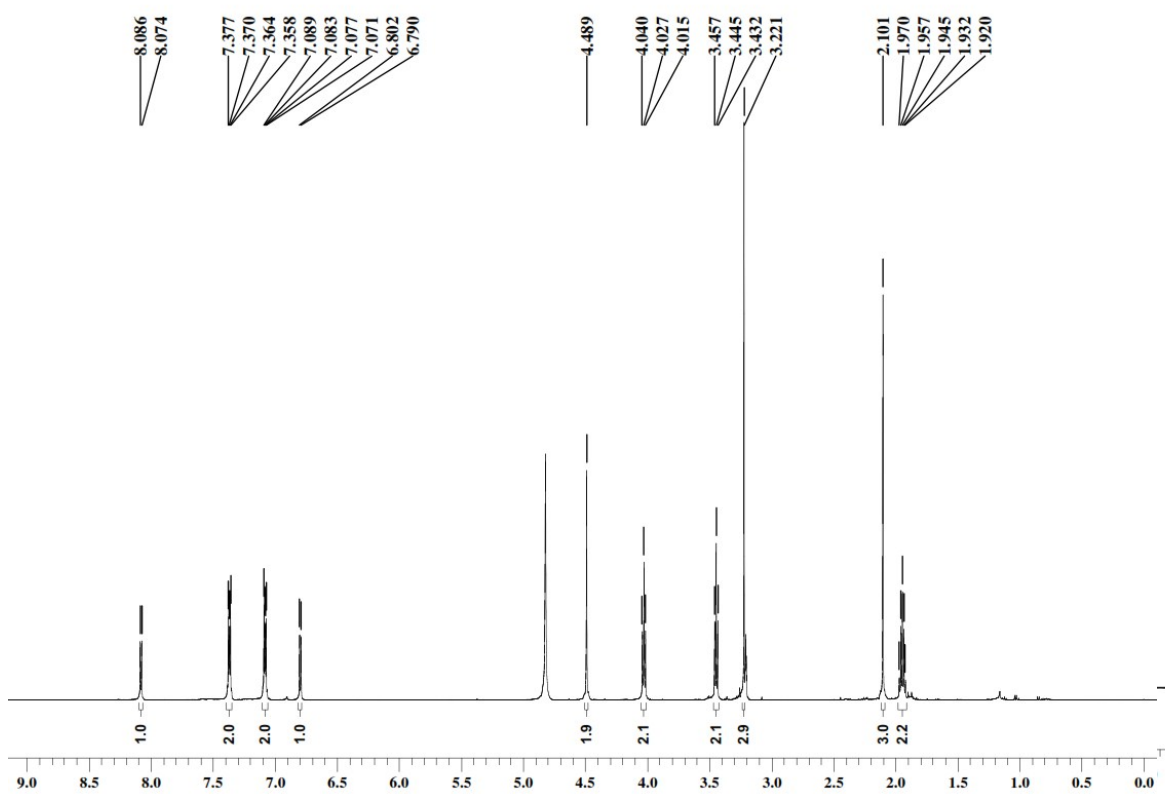

Figure S5.  $^1\text{H}$  NMR of oxidative degradation compound R7

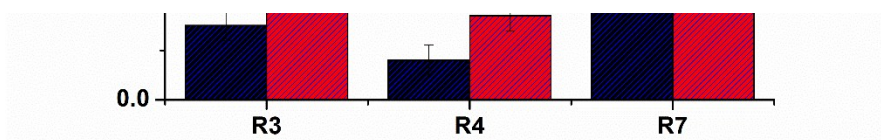

Figure S4.  $^1\text{H}$  NMR of acid degradation compound R4

**Figure S6.** IC<sub>50</sub> of **R3, R4** and **R7** on HepG2 and PANC-1 cell lines

**Table S1.** Data of intra-day and inter-day precision studies (n=3).

| <b>Concentration<br/>(<math>\mu\text{g/ml}</math>)</b> | <b>Intra-day Precision</b>                                      | <b>Inter-day Precision</b>                                      |
|--------------------------------------------------------|-----------------------------------------------------------------|-----------------------------------------------------------------|
|                                                        | Measured concentration<br>( $\mu\text{g mL}^{-1}$ ) SD; RSD (%) | Measured concentration<br>( $\mu\text{g mL}^{-1}$ ) SD; RSD (%) |
| 30                                                     | 29.95 $\pm$ 0.017;0.06                                          | 29.88 $\pm$ 0.073;0.24                                          |
| 50                                                     | 50.01 $\pm$ 0.011;0.02                                          | 49.89 $\pm$ 0.115;0.23                                          |
| 60                                                     | 60.05 $\pm$ 0.005;0.01                                          | 59.92 $\pm$ 0.130;0.22                                          |

**Table S2.** Recovery Data for metoprolol spiked into a mixture of stressed samples.

| <b>Spiked Concentration<br/>(<math>\mu\text{g/ml}</math>)</b> | <b>Calculated spiked concentration<br/>(<math>\text{ng mL}^{-1}</math>) SD; RSD (%)</b> | <b>Recovery<br/>(%)</b> |
|---------------------------------------------------------------|-----------------------------------------------------------------------------------------|-------------------------|
| 25                                                            | 24.94 $\pm$ 0.042;0.17                                                                  | 99.76                   |
| 30                                                            | 29.96 $\pm$ 0.064;0.21                                                                  | 99.86                   |
| 35                                                            | 35.02 $\pm$ 0.035;0.09                                                                  | 100.06                  |
